# Supplementary material for: Lack of the antioxidant enzyme methionine sulfoxide reductase A in mice impairs RPE phagocytosis and causes photoreceptor cone dysfunction
Source: PubMed Central journal article supplement — Redox Biol. 2021 Feb 26;42:101918. doi: 10.1016/j.redox.2021.101918 (PMC8113033; doi:10.1016/j.redox.2021.101918), 2021-02-26
Supplement: mmc1.pdf [file mmc1.pdf]

## SUPPLEMENTAL MATERIAL

### **Mazzoni et al.**

Lack of the antioxidant enzyme methionine sulfoxide reductase A in mice impairs RPE phagocytosis and causes photoreceptor cone dysfunction

**Supplemental Table S1.**

| <b>target protein</b>                    | <b>use</b> | <b>dilution used</b> | <b>catalog #, supplier</b>               |
|------------------------------------------|------------|----------------------|------------------------------------------|
| $\alpha$ -tubulin                        | WB         | 1:2000               | 9099, Cell Signaling, Danvers, MA        |
| calretinin                               | IF and WB  | 1:500/ 1:2000        | AB5054, Millipore-Sigma                  |
| cone arrestin                            | IF and WB  | 1:300/1:12000        | AB15282, Millipore-Sigma                 |
| cytochrome C                             | WB         | 1:500                | 11940, Cell Signaling                    |
| L/M-opsin                                | IF and WB  | 1:250/1:2000         | AB5405, Millipore-Sigma                  |
| MsrA                                     | WB         | 1:5000               | H00004482-D01P, Novusbio, Centennial, CO |
| Total OXPHOS rodent WB antibody cocktail | WB         | 1:1000               | Ab110413, Abcam, Cambridge, MA           |
| OXPHOS complex-I (NDUFB8)                | WB         | 1:1000               | Ab110242, Abcam                          |
| PKC- $\alpha$                            | IF and WB  | 1:1000/ 1:10000      | P4334, Millipore-Sigma                   |
| porin                                    | WB         | 1:2000               | 4866, Cell Signaling                     |
| PSD95                                    | WB         | 1:5000               | MAB1598, Millipore-Sigma                 |
| rhodopsin (B6-30)                        | IF and WB  | 1:250/ 1:500         | NBP2-25160, Novusbio                     |
| RPE65                                    | WB         | 1:2000               | 103472, Genetex, Irvine, CA              |
| S-opsin                                  | IF and WB  | 1:250/ 1:2000        | AB5407, Millipore-Sigma                  |

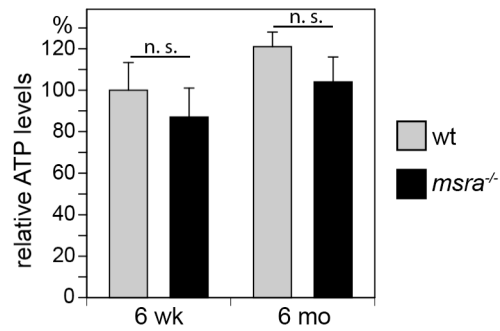

**Supplemental Figure S1.**

**Similar ATP levels in wt and *msra*<sup>-/-</sup> posterior eyecups of 6 week-old and 6 month-old mice.** ATP levels were quantified side-by-side in posterior eyecups following removal of the anterior segment and the neural retina. Bars show mean  $\pm$  s. e. m., n = 3 samples of 3 individual 6 week-old old 6-month old mice as indicated. Values are shown relative to ATP levels in eyecups of 6-week-old wt mice, which was set as 100%.

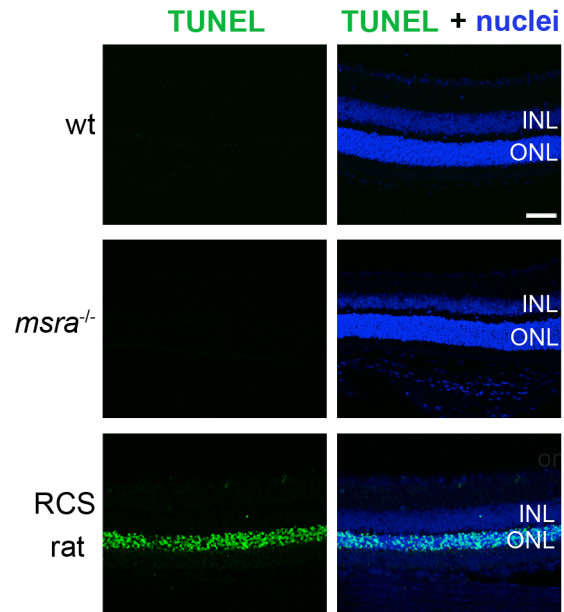

**Supplemental Figure S2.**

**No evidence of apoptotic cell death in *msra*<sup>-/-</sup> retina.** Representative micrographs are shown of retinal sections obtained from 6-week old wt or *msra*<sup>-/-</sup> mice as indicated stained with the TUNEL assay. As positive control, retina tissue of degenerating 4-week-old RCS rat retina was processed in parallel. Scale bar, 50  $\mu$ m.

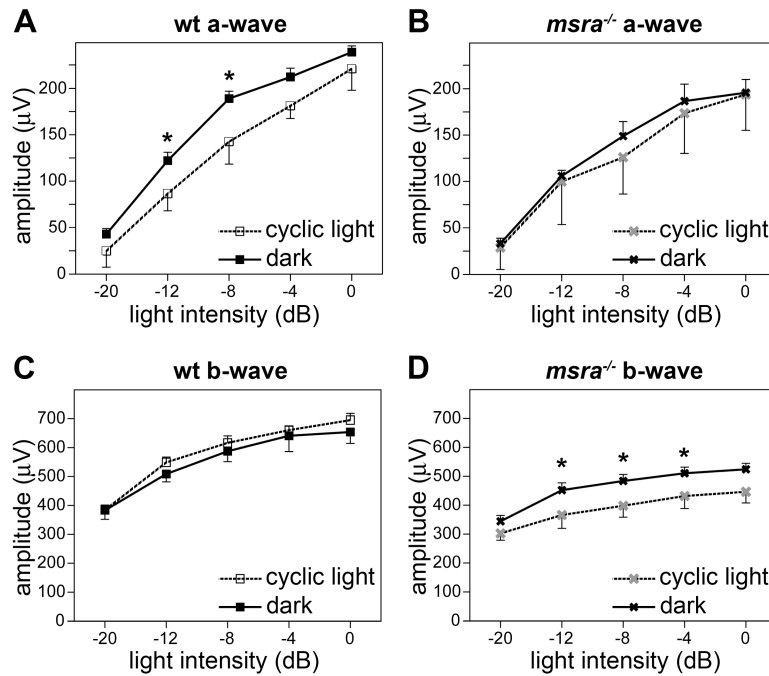

**Supplemental Figure S3.**

Side-by-side comparison of mice raised to 6 weeks of age in either complete darkness (solid lines) or in cyclic light (dotted lines) shows modest increase in scotopic ERG a-wave amplitudes in wt (A) but not *msra*<sup>-/-</sup> mice (B), and in scotopic b-wave amplitudes in *msra*<sup>-/-</sup> (D) but not wt mice (C). Data are shown separated by strain for better clarity. Panels indicate symbols and line legends. Data are compiled from results shown in Figures 4 and 6. Significant differences due to light condition as per ANOVA and Tukey's post-hoc test are indicated by \* ( $P < 0.05$ ).
